# Supplementary material for: Flexible and antibacterial conductive hydrogels based on silk fibroin/polyaniline/AgNPs for motion sensing and wound healing promotion under electrical stimulation
Source: Royal Society of Chemistry journal article supplement (doi:10.1039/d4tb01505c), 2024-01-01
Supplement: d4tb01505c1.pdf [file d4tb01505c1.pdf]

## Flexible and antibacterial conductive hydrogel based on silk fibroin/polyaniline/AgNPs for motion sensing and wound healing promotion under electrical stimulation

Ruiqi Liu,<sup>b,1</sup> Siwei Bi,<sup>b,1</sup> Linna Zhang,<sup>c</sup> Xiaoyi Li,<sup>c</sup> Kang Dai,<sup>d</sup> Haibo Wang,<sup>c</sup> Zhenyu Zhang,<sup>b,\*</sup> Jun Gu<sup>a,\*</sup>

<sup>a</sup> Department of Cardiovascular Surgery, West China Hospital, Sichuan University, Chengdu 610065, PR China.

<sup>b</sup> Department of Plastic and Burn Surgery, West China Hospital, Sichuan University, Chengdu, 610041, China.

<sup>c</sup> College of Biomass Science and Engineering, Sichuan University, Chengdu 610065, PR China.

<sup>d</sup> Department of stomatology, The General Hospital of Western Theater Command, Chengdu, Sichuan, 610083, China.

<sup>1</sup> The authors contributed equally to this work.

\*Correspondence to: Zhenyu Zhang (Email: zhangzhenyu@scu.edu.cn); Jun Gu (Email: gujun@wchscu.cn). Zhenyu Zhang and Jun Gu were corresponding Authors.

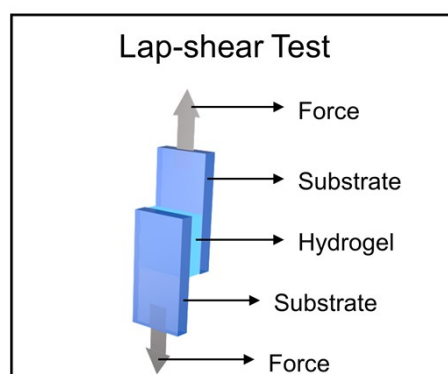

Fig. S1 Diagrammatic sketch of the lap shear experiments.

Table S1. Performance summary of representative hydrogels.

| Reference | Materials                                                       | Sensitivity | Response Time (ms) | Mechanical strength (KPa) | Elongation at break (%) |
|-----------|-----------------------------------------------------------------|-------------|--------------------|---------------------------|-------------------------|
| 1         | PNIPAM/CMCS<br>/MWCNT/PANI<br>hydrogels                         | 3.6         | /                  | 47                        | 225                     |
| 2         | PSA/LiCl/PANI<br>hydrogels                                      | 1.74        | 223                | 470                       | 600                     |
| 3         | PEDOT:PSS-<br>PVA hydrogels                                     | 3.18        | /                  | 186                       | 270                     |
| 4         | PL ( PEDOT:LS<br>) -Fe <sup>3+</sup> -<br>PAA/PVA<br>hydrogels  | 1.64        | 253                | 98.2                      | 460                     |
| 5         | CNC-<br>PEDOT : PSS/P<br>VA hydrogels                           | 7.97        | /                  | 989.6                     | 989.6                   |
| 6         | CMC/PTH/AHC<br>hydrogels                                        | /           | /                  | 758                       | 107.4                   |
| 7         | SDS/PPy/LMPA<br>m hydrogel                                      | /           | 300                | 345                       | 1021                    |
| 8         | PVA-EGaIn-<br>x@PAAm/PAA<br>@FeCl <sub>3</sub><br>@PPy hydrogel | 0.28        | /                  | 344.7                     | 700                     |
| 9         | PVA@MXene@<br>PPy hydrogel                                      | 1           | 100                | 26.78                     | 4351                    |
| 10        | PAM/PDA@PE<br>DOT hydrogel                                      | 2.82        | 140                | 187                       | 3383                    |
| This work | PAM-co-<br>SBMA/SF-<br>PANI-Ag<br>hydrogel                      | 12.17       | 210                | 239                       | 2858                    |

## References:

1.T. Zhan, H. Xie, J. Mao, S. Wang, Y. Hu and Z. Guo, *ChemistrySelect*, 2021, **6**, 4229-4237.

- 2.Z. Zhang and P. Raffa, *European Polymer Journal*, 2023, **199**.
- 3.J. Cao, Z. Zhang, K. Li, C. Ma, W. Zhou, T. Lin, J. Xu and X. Liu, *Nanomaterials (Basel)*, 2023, **13**.
- 4.X. Su, S. Zhai, K. Jin, C. Li, A. Chen, Z. Cai, C. Xian and Y. Zhao, *ACS Appl Mater Interfaces*, 2023, **15**, 45526-45535.
- 5.X. Chai, J. Tang, Y. Li, Y. Cao, X. Chen, T. Chen and Z. Zhang, *ACS Appl Mater Interfaces*, 2023, **15**, 18262-18271.
- 6.N. Danmatam, J. T. H. Pearce and D. Pattavarakorn, *Journal of Applied Polymer Science*, 2023, **141**.
- 7.X. Cao, Q. Cao, T. Zhang, W. Ji, U. Muhammad, J. Chen and Y. Wei, *Biomacromolecules*, 2024, **25**, 143-154.
- 8.Y. Li, Y. Peng, J.-Y. Tian, S. Duan, Y. Fu, S. Zhang and M. Du, *Colloids and Surfaces A: Physicochemical and Engineering Aspects*, 2023, **670**.
- 9.Z. Qin, G. Zhao, Y. Zhang, Z. Gu, Y. Tang, J. T. Aladejana, J. Ren, Y. Jiang, Z. Guo, X. Peng, X. Zhang, B. B. Xu and T. Chen, *Small*, 2023, **19**, e2303038.
10. X. Li, X. Zhao, R. Liu, H. Wang, S. Wang, B. Fan, C. Hu and H. Wang, *J. Mater. Chem. B*, 2024, **12**, 3092-3102.
